# Supplementary material
Source: PubMed Central journal article supplement (PMC4039295)

# Suppl. Figure 1.:

- 1: Splenocytes MyD88<sup>f/f</sup>
- 2: Splenocytes MyD88<sup>IEC-/-</sup>
- 3: Small Intestine MyD88<sup>f/f</sup>
- 4: Small Intestine MyD88<sup>IEC-/-</sup>
- 5: Colon MyD88<sup>f/f</sup>
- 6: Colon MyD88<sup>IEC-/-</sup>

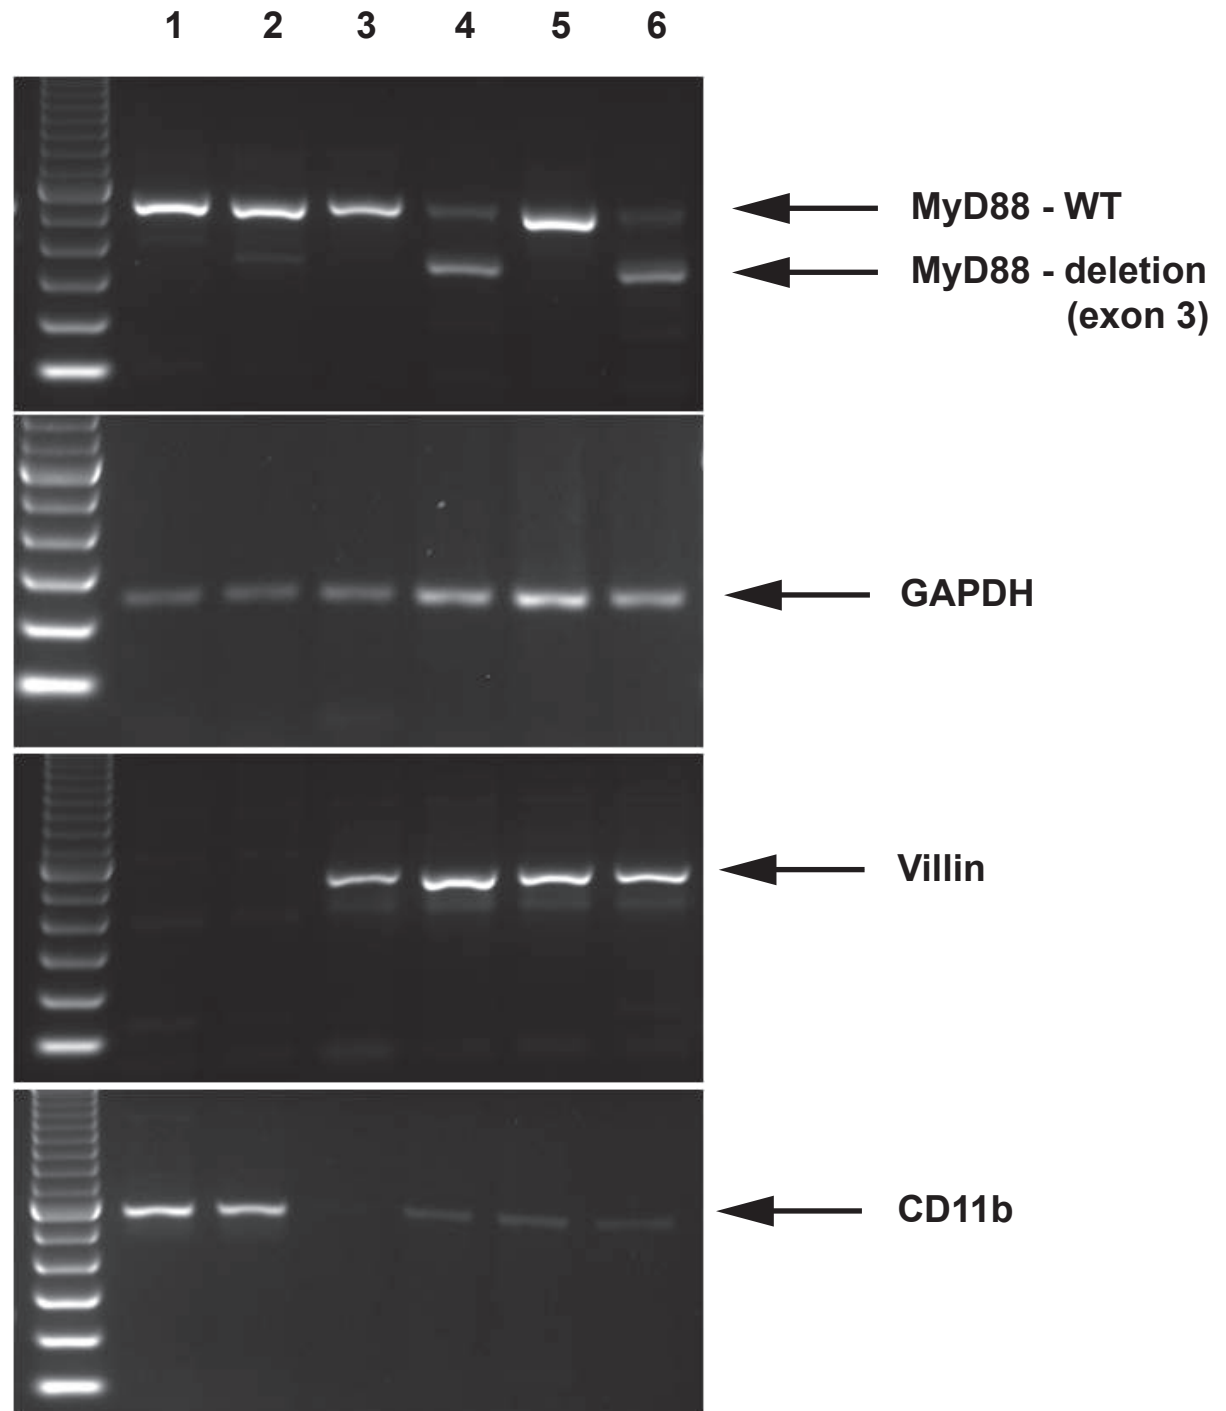

Supplement: NIHMS564724-supplement-Supp_Fig_1.pdf [file NIHMS564724-supplement-Supp_Fig_1.pdf]
